# Supplementary material for: Unraveling CO adsorption behaviors and its poisoning effects on ZrCo surface
Source: Royal Society of Chemistry journal article supplement (doi:10.1039/d3cp06251a), 2024-01-01
Supplement: d3cp06251a1.pdf [file d3cp06251a1.pdf]

Supporting Information for

**Unraveling CO adsorption behaviors and its poisoning  
effects on ZrCo surface**

Yuejing Lan <sup>1,2</sup>, Ru Tang <sup>2</sup>, Rongxing Ye <sup>2</sup>, Minan Su <sup>2</sup>, Qianghua Lei <sup>2</sup>, Fei Li <sup>1,\*</sup>,

Xiaofeng Tian <sup>1</sup>, Jiangfeng Song <sup>2</sup>, Linsen Zhou<sup>2,\*</sup>

<sup>1</sup> *College of Nuclear Technology and Automation Engineering, Chengdu University of  
Technology, Chengdu 610059, China*

<sup>2</sup> *Institute of Materials, China Academy of Engineering Physics, Mianyang 621907,  
China*

\* : Corresponding author, [lifei17@cdut.edu.cn](mailto:lifei17@cdut.edu.cn) (F.L), [zhoulinsen173@aliyun.com](mailto:zhoulinsen173@aliyun.com) (L.Z)

Table S1 the only one imaginary vibrational frequency for the pathways of H<sub>2</sub> dissociative adsorption on clean and CO pre-adsorbed ZrCo(110) surface.

| transition state              | imaginary frequency (cm <sup>-1</sup> ) | vibration mode                     |
|-------------------------------|-----------------------------------------|------------------------------------|
| H <sub>2</sub> -ZrCo (path 1) | -1088                                   | H-H bond stretching                |
| H <sub>2</sub> -ZrCo (path 2) | -281                                    | H <sub>2</sub> frustrated rotation |
| H <sub>2</sub> -6CO/ZrCo      | -880                                    | H-H bond stretching                |

Table S2 The adsorption energies  $E_{\text{ads}}$  and bond length distances  $d_{\text{H-H}}$  for  $\text{H}_2$  adsorbed on different sites of ZrCo(110) surface, with the corresponding structures shown Fig. S5.

| sites                             | T1    | T2    | B1    | B2    | H1    |
|-----------------------------------|-------|-------|-------|-------|-------|
| $E_{\text{ads}}$ without ZPE (eV) | -1.19 | -0.24 | -0.06 | -1.56 | -0.03 |
| $E_{\text{ads}}$ (eV)             | -1.17 | -0.14 | -0.02 | -1.47 | 0.02  |
| $d_{\text{H-H}}$ (Å)              | 3.07  | 0.79  | 0.75  | 2.39  | 0.75  |

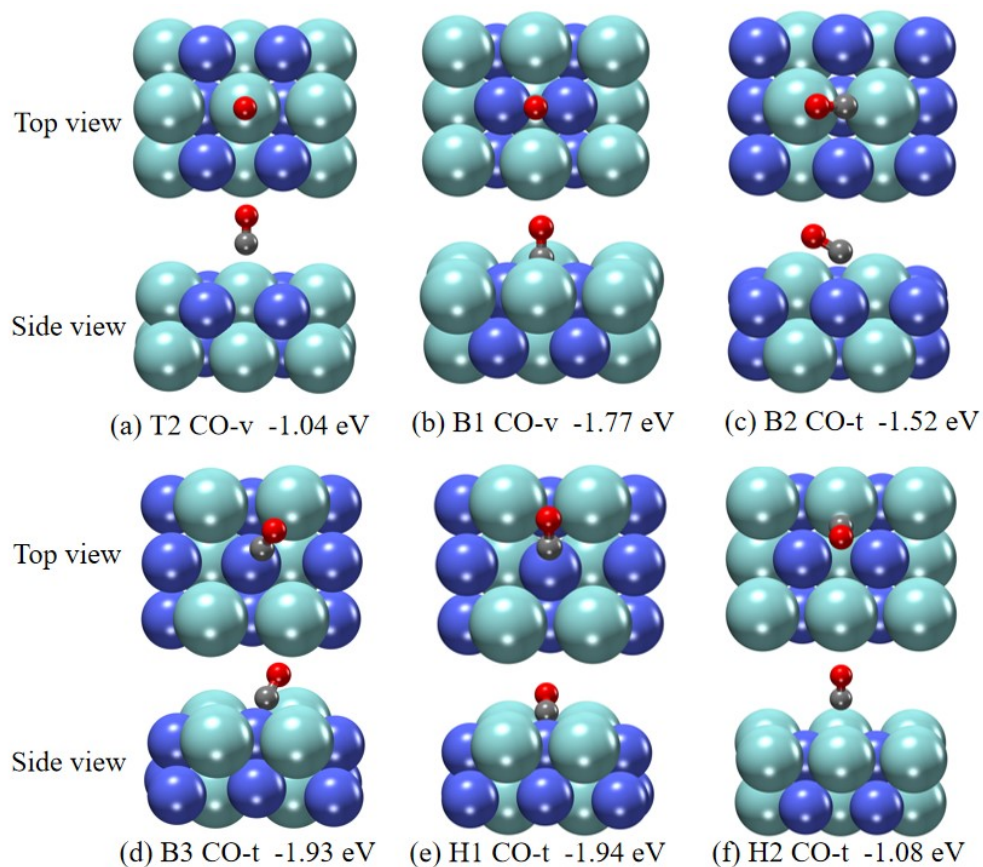

Fig. S1 The stable adsorption structures for CO-v and CO-t on different sites of ZrCo(110) surface. The Zr, Co, C, and O atoms are colored in cyan, blue, black, and red, respectively.

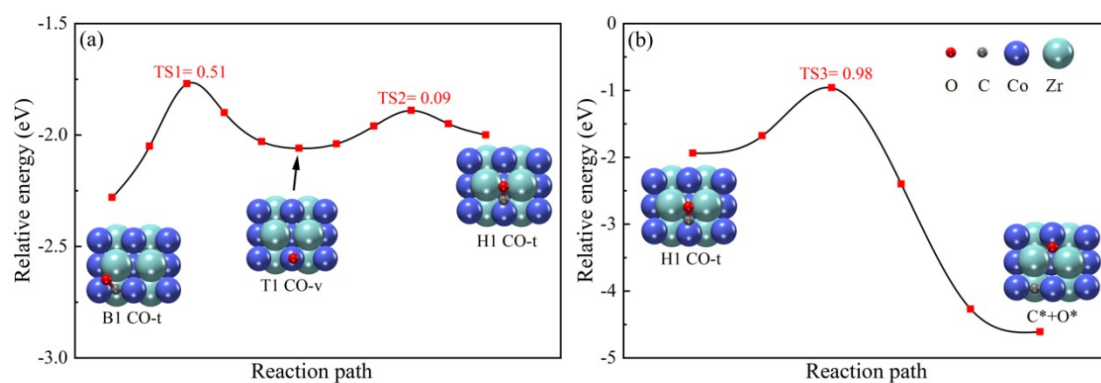

Fig. S2 (a) The diffusion of most stable CO-t on B1 site to CO-v on T1 site and then to CO-t on H1 sites. (b) The dissociation of CO-t at H1 site of the ZrCo(110) surface. The Zr, Co, C, and O atoms are colored in cyan, blue, black, and red, respectively.

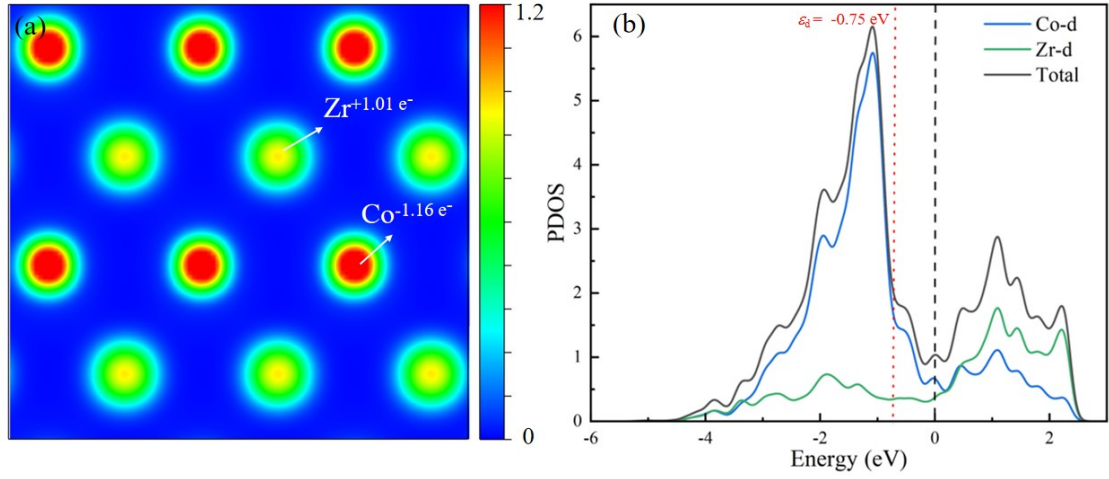

Fig. S3 The charge density and partial density of states (PDOS) of ZrCo(110) surface. The d-band center ( $\epsilon_d$ ) of surface is denoted with a red dotted line and Fermi energy is indicated by the vertical black dash line at 0 eV.

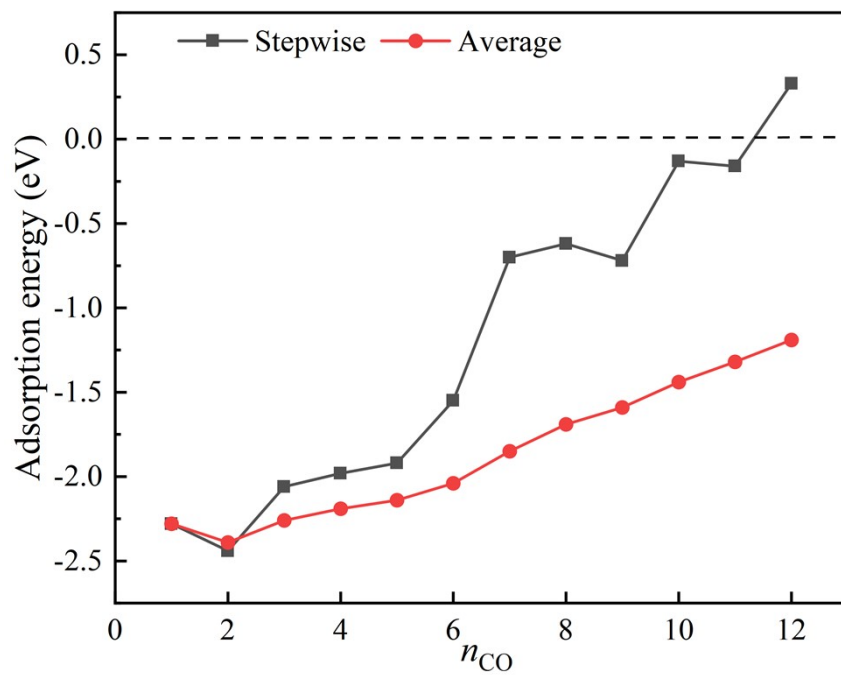

Fig. S4 The stepwise and average adsorption energies as a function of the number of CO molecules on ZrCo(110) surface.

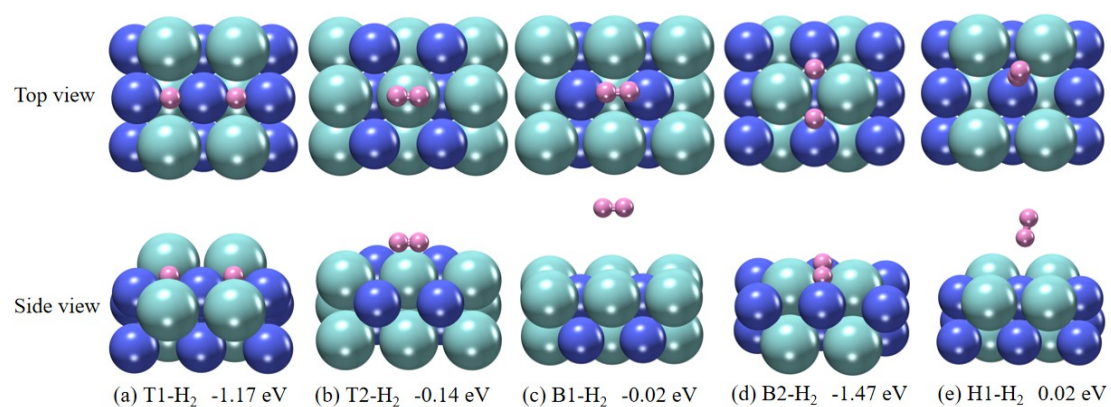

Fig. S5 The optimized structures of H<sub>2</sub> adsorbed on different sites of the clean ZrCo(110) surface. The Zr, Co, and H atoms are colored in cyan, blue, and pink, respectively.



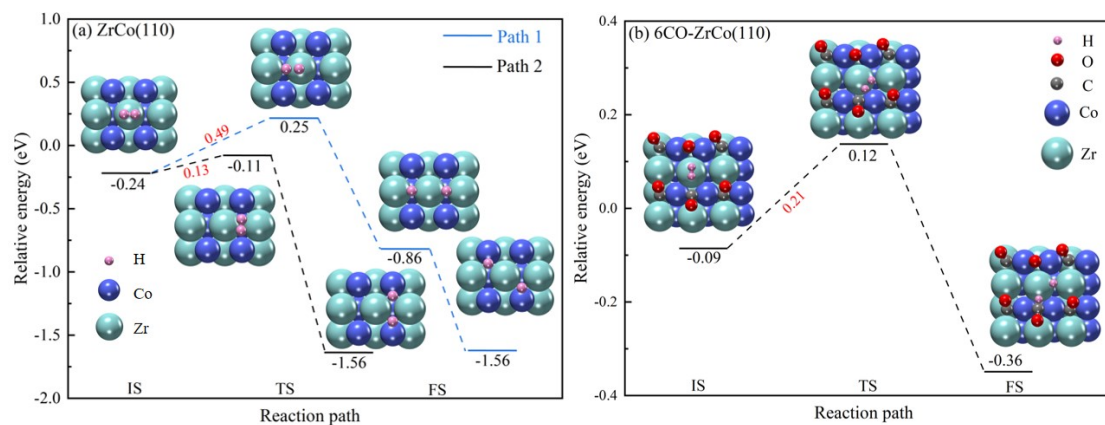

Fig. S6 The dissociation energy paths for  $H_2$  adsorbed on T2 site of (a) the clean  $ZrCo(110)$  and (b)  $6CO-ZrCo(110)$  surfaces. The energy values without ZPE are relative to the free gas  $H_2$  and metal surface. The Zr, Co, C, O, and H atoms are colored in cyan, blue, black, red, and pink, respectively.

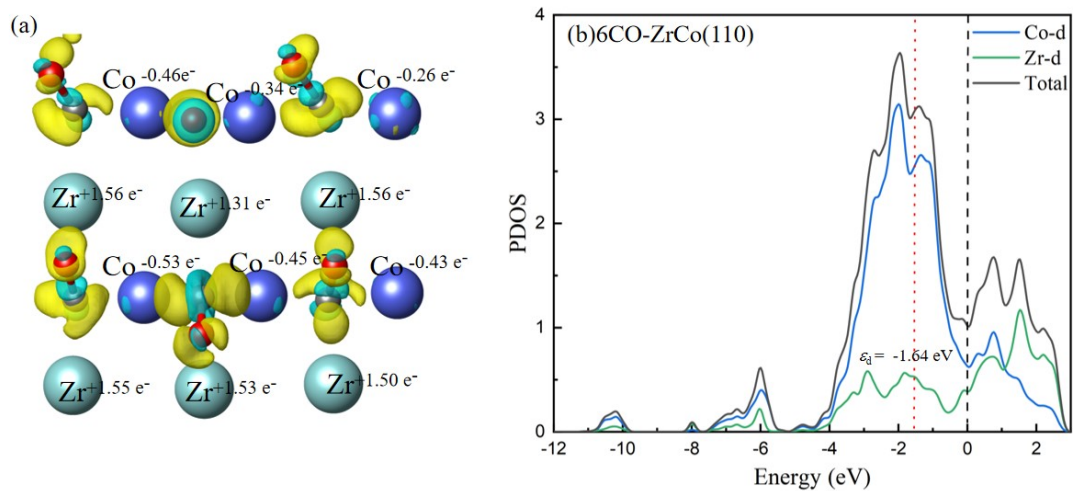

Fig. S7 (a) CDD and (b) PDOS for 6CO/ZrCo(110) surface. The iso-surface of charge density is  $0.02 \text{ e}^-/\text{bohr}^3$ . The yellow and light blue outlines represent electron accumulation and depletion regions, respectively. The Bader charges for each atom are also given. The d-band center of surface is denoted with a red dotted line and fermi energy is indicated by the vertical black dash line at 0 eV.

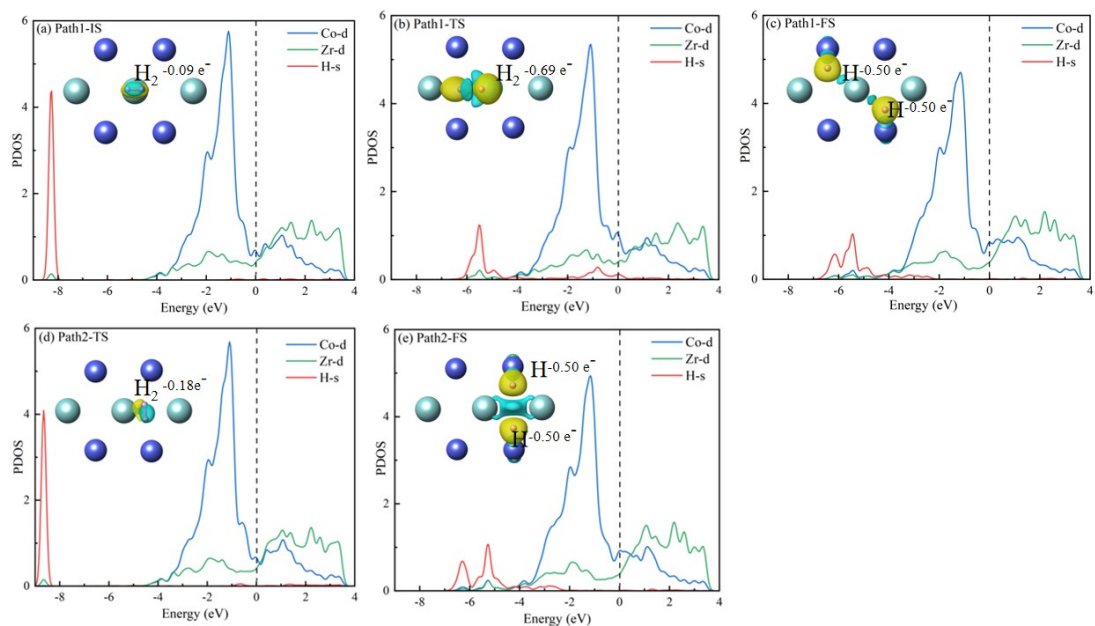

Fig. S8 PDOS for IS, TS, and FS points of two  $\text{H}_2$  dissociation paths on the clean  $\text{ZrCo}(110)$  surface. The corresponding CDD are also plotted in inset, where the yellow and light blue outlines represent electron accumulation and depletion regions, respectively. The Zr, Co, C, and O atoms are colored in cyan, blue, black, and red, respectively.
